# Supplementary material for: Similarities in Virulence and Extended Spectrum Beta-Lactamase Gene Profiles among Cefotaxime-Resistant Escherichia coli Wastewater and Clinical Isolates
Source: MDPI journal article supplement (doi:10.3390/antibiotics11020260), 2022-02-17
Supplement: s1 [file s1]

## Supplementary Materials

**Table S1.** Primers used in this study.

| Gene                        | Primer  | Sequence (5'–3')           | Size (bps) | T <sub>m</sub> (°C) | Reference |
|-----------------------------|---------|----------------------------|------------|---------------------|-----------|
| <i>chuA</i>                 | Forward | ATGGTACCGGACGAACCAAC       | 288        | 59                  | [25]      |
|                             | Reverse | TGCCGCCAGTACCAAAGACA       |            |                     |           |
| <i>yjaA</i>                 | Forward | CAAACGTGAAGTGTGTCAGGAG     | 211        | 59                  | [25]      |
|                             | Reverse | AATGCGTTCCTCAACCTGTG       |            |                     |           |
| <i>TspE4.C2</i>             | Forward | CACTATTCGTAAGGTCATCC       | 152        | 59                  | [25]      |
|                             | Reverse | AGTTTATCGCTGCGGGTCGC       |            |                     |           |
| <i>arpA</i>                 | Forward | AACGCTATTCGCCAGCTTGC       | 400        | 59                  | [25]      |
|                             | Reverse | TCTCCCCATACCGTACGCTA       |            |                     |           |
| <i>arpAgpE</i>              | Forward | GATTCCATCTTGTCAAAATATGCC   | 301        | 57                  | [25]      |
|                             | Reverse | GAAAAGAAAAAGAATTCCCAAGAG   |            |                     |           |
| <i>trpA</i>                 | Forward | AGTTTTATGCCAGTGCGAG        | 219        | 59                  | [25]      |
|                             | Reverse | TCTGCGCCGGTCACGCCC         |            |                     |           |
| <i>CTX-M-1 group</i>        | Forward | GGTTAAAAAATCACTGCGGC       | 863        | 56                  | [91]      |
|                             | Reverse | TTGGTGACGATTTTAGCCGC       |            |                     |           |
| <i>CTX-M-2 group</i>        | Forward | ATGATGACTCAGAGCATTCG       | 865        | 56                  | [91]      |
|                             | Reverse | TGGGTACGATTTTCGCCGC        |            |                     |           |
| <i>CTX-M-9 group</i>        | Forward | ATGGTGACAAAGAGAGTGCA       | 863        | 56                  | [91]      |
|                             | Reverse | CCCTTCGGCGATGATTCTC        |            |                     |           |
| <i>bla<sub>TEM</sub></i>    | Forward | CCGTGTCGCCCTTATTCC         | 786        | 60                  | [92]      |
|                             | Reverse | AGGCACCTATCTCAGCGA         |            |                     |           |
| <i>bla<sub>SHV</sub></i>    | Forward | GGTTATGCGTTATATTGCGC       | 867        | 60                  | [93]      |
|                             | Reverse | TTAGCGTTGCCAGTGCTC         |            |                     |           |
| <i>bla<sub>KPC1-5</sub></i> | Forward | CATTCAAGGGCTTTCTTGCTGC     | 538        | 55                  | [94]      |
|                             | Reverse | ACGACGGCATAGTCATTTGC       |            |                     |           |
| <i>bla<sub>OXA-1</sub></i>  | Forward | ATATCTCTACTGTTGCATCTCC     | 619        | 54                  | [95]      |
|                             | Reverse | AAACCCTTCAAACCATCC         |            |                     |           |
| <i>Int1 (5'CS, 3'CS)</i>    | Forward | GGCATCCAAGCAGCAAG          | variable   | 55                  | [96]      |
|                             | Reverse | AAGCAGACTTGACCTGA          |            |                     |           |
| <i>fimH</i>                 | Forward | AACAGCGATGATTTCCAGTTTGTGTG | 465        |                     | [70]      |
|                             | Reverse | ATTGCGTACCAGCATTAGCAATGTCC |            |                     |           |
| <i>papC</i>                 | Forward | GACGGCTGTACTGCAGGGTGTGGCG  | 328        |                     | [70]      |
|                             | Reverse | ATATCCTTTCTGCAGGGATGCAATA  |            |                     |           |
| <i>sfa</i>                  | Forward | CTCCGGAGAACTGGGTGCATCTTAC  | 410        |                     | [70]      |
|                             | Reverse | CGGAGGAGTAATTACAAACCTGGCA  |            |                     |           |
| <i>afaC</i>                 | Forward | CGGCTTTTCTGCTGAACTGGCAGGC  | 672        |                     | [70]      |
|                             | Reverse | CCGTCAGCCCCCACGGCAGACC     |            |                     |           |
| <i>hlyca</i>                | Forward | AGATTCTTGGGCATGTATCCT      | 556        |                     | [70]      |
|                             | Reverse | TTGCTTTGCAGACTGTAGTGT      |            |                     |           |
| <i>cnf</i>                  | Forward | TTATATAGTCGTCAAGATGGA      | 693        |                     | [70]      |
|                             | Reverse | CACTAAGCTTTACAATATTGA      |            |                     |           |
| <i>Aer (iucC)</i>           | Forward | AAACCTGGCTTACGCAACTGT      | 269        |                     | [70]      |
|                             | Reverse | ACCCGTCTGCAAATCATGGAT      |            |                     |           |

**Table S2.** Antimicrobial susceptibility profiles present in *E. coli* isolates from different environments.

| Resistance pattern                | ESBL producer | Source           |                       |                             |                             |
|-----------------------------------|---------------|------------------|-----------------------|-----------------------------|-----------------------------|
|                                   |               | Clinic<br>(n=11) | Hospital WW<br>(n=22) | Urban Influent WW<br>(n=19) | Urban Effluent WW<br>(n=17) |
| No resistance cephalosporins, but |               | 1                |                       |                             |                             |
| ESBL producer                     |               |                  |                       |                             |                             |
| ERT                               | N             | 1                |                       |                             |                             |
| CAZ                               | N             |                  |                       |                             | 1                           |
| CRO CTX                           | N             |                  |                       |                             | 1                           |
| CRO CAZ CTX                       | N             |                  | 2                     |                             | 2                           |
| CRO CAZ CTX ERT                   | N             |                  |                       | 2                           |                             |
| CRO CTX                           | Y             |                  |                       | 2                           | 2                           |
| CRO CAZ CTX                       | Y             |                  |                       |                             | 2                           |
| TET CRO CTX                       | N             |                  |                       |                             | 1                           |
| TET CRO CAZ CTX                   | Y             | 2                |                       |                             |                             |
| CIP CRO CTX                       | Y             | 1                |                       |                             |                             |
| CIP CRO CAZ CTX                   | Y             |                  |                       | 1                           |                             |
| CIP TET CRO CTX                   | Y             | 1                |                       |                             |                             |
| GEN TET CRO CAZ CTX               | Y             |                  |                       |                             | 1                           |
| GEN CIP TET CRO CAZ CTX ERT       | N             |                  |                       | 1                           |                             |
| CHL SXT TET CRO CAZ CTX           | Y             |                  |                       |                             | 1                           |
| CHL SXT CIP TET CRO CTX           | N             | 1                |                       |                             |                             |
| CHL SXT GEN TET CRO CTX           | Y             |                  |                       | 2                           |                             |
| CHL SXT GEN TET CRO CAZ CTX       | Y             |                  |                       |                             | 1                           |
| SXT TET CRO CAZ CTX               | N             |                  |                       | 1                           | 1                           |
| SXT TET CRO CTX                   | Y             |                  |                       | 2                           |                             |
| SXT TET CRO CAZ CTX               | Y             |                  |                       |                             | 1                           |
| SXT CIP CRO CTX                   | Y             | 2                |                       |                             |                             |
| SXT CIP TET CRO CTX               | N             |                  |                       |                             | 1                           |
| SXT CIP TET CRO CTX               | Y             | 1                |                       |                             | 1                           |
| SXT CIP TET CRO CAZ CTX           | Y             | 1                |                       |                             | 1                           |
| SXT GEN TET CRO CTX               | Y             |                  |                       |                             | 2                           |
| SXT GEN TET CRO CAZ CTX           | N             |                  |                       | 1                           |                             |
| SXT GEN TET CRO CAZ CTX           | Y             |                  |                       | 2                           |                             |
| SXT GEN CIP CRO CAZ CTX           | Y             | 1                |                       |                             |                             |
| SXT GEN CIP TET CRO CAZ CTX       | N             |                  | 8                     | 3                           |                             |
| SXT GEN CIP TET CRO CAZ CTX       | Y             |                  | 3                     | 1                           |                             |
| SXT GEN CIP TET CRO CAZ CTX       | N             |                  |                       | 1                           |                             |
| ERT                               |               |                  |                       |                             |                             |
| SXT GEN CIP TET CRO CAZ CTX       | N             |                  | 1                     |                             |                             |
| MEM                               |               |                  |                       |                             |                             |
| SXT GEN CIP TET CRO CAZ CTX       | N             |                  | 3                     |                             |                             |
| MEM ERT                           |               |                  |                       |                             |                             |
| SXT GEN CIP TET CRO CAZ CTX       | Y             |                  | 1                     |                             |                             |
| MEM ERT                           |               |                  |                       |                             |                             |
| SXT GEN CIP TET CRO CAZ CTX       | N             |                  | 2                     |                             |                             |
| MEM IMP ERT                       |               |                  |                       |                             |                             |
| SXT GEN CIP TET CRO CAZ CTX       | Y             |                  | 2                     |                             |                             |
| MEM IMP ERT                       |               |                  |                       |                             |                             |

**Table S3.** Phylogroups and sources of CTX-resistance.

| Source           | Prevalence (%) |         |        |         |        |        |        |                        |                 |       |         |
|------------------|----------------|---------|--------|---------|--------|--------|--------|------------------------|-----------------|-------|---------|
|                  | N              | A       | B1     | B2      | C      | D      | E      | Clade III,<br>IV, or V | E or<br>Clade 1 | F     | Unknown |
| Clinical         | 11             | 0       | 2 (18) | 7 (64)  | 0      | 1(9)   | 0      | 0                      | 0               | 1 (9) | 0       |
| Hospital         | 22             | 17 (77) | 0      | 0       | 0      | 1(5)   | 1 (5)  | 3(14)                  | 0               | 0     | 0       |
| WW               |                |         |        |         |        |        |        |                        |                 |       |         |
| Urban Influent   | 15             | 2 (13)  | 2 (13) | 1 (7)   | 2 (13) | 2 (13) | 3 (20) | 0                      | 1 (7)           | 0     | 2 (13)  |
| Treated effluent | 16             | 4 (27)  | 5 (33) | 2 (13)  | 0      | 0      | 3 (20) | 1 (7)                  | 0               | 0     | 0       |
| <b>Total</b>     | 63             | 23 (37) | 9 (14) | 10 (16) | 2 (3)  | 4 (6)  | 7 (11) | 4 (6)                  | 1 (2)           | 1 (2) | 2 (3)   |

**Table S4.** Plasmid-mediated antibiotic resistant phenotypes.

| Strain             | Antibiotic Susceptibility of Transformed Plasmids |     |     |     |     |     |     |     |     |
|--------------------|---------------------------------------------------|-----|-----|-----|-----|-----|-----|-----|-----|
|                    | CHL                                               | SXT | GEN | CIP | TET | CRO | CTX | CAZ | MEM |
| <i>Hospital WW</i> |                                                   |     |     |     |     |     |     |     |     |
| 1000C-C3           | S                                                 | S   | S   | S   | S   | R   | R   | R   | R   |
| 1000C-C4           | S                                                 | S   | S   | S   | S   | R   | R   | R   | R   |
| 1000D-C3           | S                                                 | S   | S   | S   | S   | R   | R   | R   | S   |
| 1000D-C4           | S                                                 | S   | S   | S   | S   | R   | R   | R   | R   |
| <i>WW influent</i> |                                                   |     |     |     |     |     |     |     |     |
| I-C3               | S                                                 | S   | S   | S   | S   | R   | R   | R   | S   |
| I-C10              | S                                                 | S   | S   | S   | S   | R   | R   | R   | S   |
| <i>WW effluent</i> |                                                   |     |     |     |     |     |     |     |     |
| E-C3               | S                                                 | S   | S   | S   | S   | R   | R   | R   | S   |
| E-C4               | S                                                 | S   | S   | S   | S   | R   | R   | R   | S   |
| E-C5               | S                                                 | S   | S   | S   | S   | R   | R   | R   | S   |
| E-C9               | S                                                 | S   | S   | S   | S   | R   | R   | R   | S   |

S: susceptible; R: resistant

**Table S5.** PlasmidFinder incompatibility groupings of *E. coli* 1000C-3.

| Organism and plasmid                                   | Incompatability group | Identity (%) | Query / Template length | Position in contig | Accession number |
|--------------------------------------------------------|-----------------------|--------------|-------------------------|--------------------|------------------|
| <b>pMHW-1</b>                                          |                       |              |                         |                    |                  |
| <i>Serratia marcescens</i> strain RIO-5 plasmid pRIO-5 | IncP6                 | 99.88        | 806 / 806               | 279..1084          | JF785550         |
| <b>pMHW-2</b>                                          |                       |              |                         |                    |                  |
| <i>Escherichia coli</i> K-12 plasmid F                 | IncFIA                | 99.48        | 388 / 388               | 120085..120471     | AP001918         |
| <i>Escherichia coli</i> K-12 plasmid F                 | IncFIB                | 98.51        | 603 / 682               | 1..603             | AP001918         |
| <i>Escherichia coli</i> plasmid pC15-1a                | IncFII                | 95.42        | 262 / 261               | 58486..58747       | AY458016         |

**Table S6.** Annotation of *E. coli* 1000C-3 plasmids.

| Gene                                    | Function                                           | BLASTp<br>Query Length | Query<br>Coverage | % Identity | Accesssion     | Location (nt)  |
|-----------------------------------------|----------------------------------------------------|------------------------|-------------------|------------|----------------|----------------|
| <b>pMHW-1</b>                           |                                                    |                        |                   |            |                |                |
| <b>ARGs</b>                             |                                                    |                        |                   |            |                |                |
| <i>merP</i>                             | Mercury periplasmic binding protein                | 91                     | 100%              | 100.00%    | WP_003150552.1 | 6737..7012     |
| <i>merT</i>                             | Mercury transport protein                          | 116                    | 100%              | 100.00%    | WP_003089115.1 | 7025..7375     |
| <i>merR</i>                             | Mercury resistance operon regulator                | 132                    | 100%              | 100.00%    | WP_003089120.1 | 9787..10185    |
| <i>KPC-2</i>                            | Carbapenemase                                      | 293                    | 100%              | 100.00%    | WP_004199234.1 | 23393..24274   |
| <i>TEM-150</i>                          | Extended-spectrum beta-lactamases                  | 864                    | 100%              | 99.54%     | WP_045286946.1 | 24477..25363   |
| <b>Plasmid Replication and Transfer</b> |                                                    |                        |                   |            |                |                |
| <i>RIP</i>                              | Replication Initiation Protein                     | 458                    | 100%              | 100.00%    | WP_033996214.1 | 1..1377        |
| <i>KfrA</i>                             | DNA-binding Protein                                | 303                    | 100%              | 100.00%    | WP_033996289.1 | 10759..11670   |
| <i>DnaC</i>                             | DNA helicase loader                                | 251                    | 100%              | 100.00%    | WP_115455360.1 | 13662..14417   |
| <i>Relaxase</i>                         | Mobilization Protein                               | 890                    | 100%              | 100.00%    | CAE6190507.1   | 18532..21204   |
| <i>TnpR</i>                             | resolvase                                          | 185                    | 100%              | 100.00%    | WP_001217881.1 | 26305..26862   |
| <i>TnpA</i>                             | transposase                                        | 136                    | 100%              | 100.00%    | WP_025760448.1 | 27025..27435   |
| <i>Xho1</i>                             | Restriction Enzyme                                 | 170                    | 100%              | 99.41%     | CAE6310107.1   | 37821..38333   |
| <i>ParA</i>                             | plasmid partitioning                               | 212                    | 100%              | 100.00%    | WP_033996216.1 | 38775..39413   |
| <b>pMHW-2</b>                           |                                                    |                        |                   |            |                |                |
| <b>ARGs</b>                             |                                                    |                        |                   |            |                |                |
| <i>dfp17</i>                            | Trimethoprim resistance                            | 210                    | 100%              | 100.00%    | AIG72712.1     | 14653..14681   |
| <i>aadA5</i>                            | Streptomycin resistance                            | 262                    | 100%              | 100.00%    | WP_000503573.1 | 15530..16318   |
| <i>qacE</i>                             | Quaternary ammonium efflux transporter             | 115                    | 100%              | 100.00%    | WP_000679427.1 | 16524..16871   |
| <i>sul1</i>                             | Sulfonamide resistance                             | 279                    | 100%              | 99.64%     | WP_060614905.1 | 16865..17704   |
| <i>mphR</i>                             | Macrolide resistance                               | 194                    | 100%              | 100.00%    | AHX99591.1     | 21196..21780   |
| <i>mrxA</i>                             | Macrolide resistance                               | 412                    | 100%              | 99.76%     | WP_053919431.1 | 21780..23018   |
| <i>mph(A)</i>                           | Macrolide resistance                               | 301                    | 100%              | 99.67%     | EFY0167116.1   | 23015..23920   |
| <i>CTX-M-15</i>                         | Extended-spectrum beta-lactamases                  | 291                    | 100%              | 100.00%    | WP_000239590.1 | 27443..28318   |
| <i>catB3</i>                            | Chloramphenicol resistance                         | 182                    | 100%              | 100.00%    | WP_012783949.1 | 29577..30125   |
| <i>OXA-1</i>                            | Extended-spectrum beta-lactamases                  | 291                    | 100%              | 100.00%    | CAE6180605.1   | 30261..31091   |
| <i>aac(6')-Ib-cr</i>                    | Aminoglycoside resistance                          | 230                    | 100%              | 99.57%     | ACQ41894.1     | 31222..31821   |
| <i>tetR</i>                             | Tetracycline repressor                             | 82                     | 100%              | 100.00%    | EAV8592204.1   | 34517..34765   |
| <i>tetR</i>                             | Tetracycline repressor                             | 142                    | 100%              | 100.00%    | VCZ91928.1     | 34765..35193   |
| <i>tetA</i>                             | Tetracycline resistance                            | 246                    | 100%              | 100.00%    | WP_080393458.1 | 35730..36470   |
| <i>sitD</i>                             | Hydrogen peroxide resistance; iron ABC transporter | 285                    | 100%              | 100.00%    | WP_000968139.1 | 139015..139872 |
| <b>Virulence gene</b>                   |                                                    |                        |                   |            |                |                |
| <i>iutA</i>                             | Receptor ferric aerobactin                         | 733                    | 100%              | 100.00%    | WP_000973519.1 | 127712..129913 |
| <i>iucD</i>                             | Biosynthesis of siderophore aerobactin             | 425                    | 100%              | 100.00%    | WP_000750130.1 | 129995..131272 |
| <i>iucC</i>                             | Biosynthesis of siderophore aerobactin             | 580                    | 100%              | 100.00%    | WP_001015721.1 | 131269..133011 |
| <i>iucB</i>                             | Biosynthesis of siderophore aerobactin             | 315                    | 100%              | 100.00%    | WP_000011908.1 | 133011..133958 |
| <i>iucA</i>                             | Biosynthesis of siderophore aerobactin             | 574                    | 100%              | 100.00%    | WP_000602863.1 | 133959..135683 |
| <b>Plasmid maintenance</b>              |                                                    |                        |                   |            |                |                |
| <i>pemK</i>                             | Endoribonuclease (toxin)                           | 110                    | 100%              | 100.00%    | WP_000439434.1 | 42421..42822   |
| <i>pemI</i>                             | Anti-toxin                                         | 85                     | 100%              | 100.00%    | WP_000557619.1 | 42755..43012   |
| <i>ltrA</i>                             | Group II intron reverse transcriptase              | 633                    | 100%              | 100.00%    | WP_000936285.1 | 104447..106348 |
| <i>sopB</i>                             | Control of plasmid partitioning                    | 323                    | 100%              | 100.00%    | WP_000817031.1 | 116851..117822 |

|                   |                                                                |      |      |         |                |                |
|-------------------|----------------------------------------------------------------|------|------|---------|----------------|----------------|
| <i>sopA</i>       | Control of plasmid partitioning                                | 388  | 100% | 100.00% | WP_000772446.1 | 117822..118997 |
| <i>repE</i>       | Replication initiator                                          | 251  | 100% | 100.00% | WP_000852146.1 | 119576..120331 |
| <i>ccdB</i>       | Toxin: inhibitor of DNA topoisomerase type II                  | 101  | 100% | 100.00% | WP_001159871.1 | 121860..12265  |
| <i>ccdA</i>       | Anti-toxin: inhibits post-segregational killing by <i>ccdB</i> | 72   | 100% | 100.00% | WP_000813630.1 | 122167..122385 |
| <b>Tra operon</b> |                                                                |      |      |         |                |                |
| <i>TraX</i>       | Pilus Acetylase                                                | 248  | 100% | 100.00% | WP_023149624.1 | 64678..65424   |
| <i>TraI</i>       | Helicase                                                       | 1706 | 100% | 100.00% | WP_013362805.1 | 65444..70564   |
| <i>TraD</i>       | Transfer Coupling Protein                                      | 729  | 100% | 100.00% | WP_040110343.1 | 70564..72753   |
| <i>TraT</i>       | Complement Resistance Protein                                  | 243  | 100% | 100.00% | WP_000850424.1 | 73005..73736   |
| <i>TraS</i>       | Transfer exclusion protein                                     | 169  | 100% | 100.00% | WP_000628100.1 | 73750..74259   |
| <i>TraG</i>       | Transfer Protein                                               | 654  | 98%  | 99.07%  | EEY5833906.1   | 75941...77905  |
| <i>TraH</i>       | Transfer Protein                                               | 458  | 100% | 100.00% | WP_013362802.1 | 77902...79278  |
| <i>TrbF</i>       | Transfer protein                                               | 130  | 100% | 100.00% | WP_000164675.1 | 79262...79654  |
| <i>TrbJ</i>       | Transfer protein                                               | 104  | 100% | 100.00% | WP_152932543.1 | 79608..79992   |
| <i>TrbB</i>       | Pilin Assembly Protein                                         | 184  | 100% | 100.00% | WP_001553830.1 | 79912..80466   |
| <i>TraQ</i>       | Pilin Chaperone                                                | 89   | 100% | 94.68%  | WP_000624105.1 | 80453..80722   |
| <i>TrbA</i>       | Transfer protein                                               | 113  | 100% | 100.00% | WP_000556794.1 | 81119..81460   |
| <i>TraF</i>       | Pilin Assembly Protein                                         | 247  | 100% | 99.60%  | WP_062894221.1 | 81474..82217   |
| <i>TrbE</i>       | Transfer protein                                               | 86   | 100% | 100.00% | ARZ86200.1     | 82210..82470   |
| <i>Trbu</i>       | Transfer protein                                               | 86   | 100% | 100.00% | ARZ86200.1     | 82210..82470   |
| <i>TraN</i>       | Stabilization Protein                                          | 602  | 100% | 100.00% | WP_000821840.1 | 82494..84302   |
| <i>TrbC</i>       | Pilin Assembly Protein                                         | 208  | 100% | 100.00% | PVF70563.1     | 84299..84925   |
| <i>TraU</i>       | Pilus Assembly Protein                                         | 330  | 100% | 100.00% | WP_000830180.1 | 84946..85938   |
| <i>TraW</i>       | Transfer Protein                                               | 210  | 100% | 100.00% | WP_001203720.1 | 85935..86567   |
| <i>TrbI</i>       | Transfer protein                                               | 128  | 100% | 100.00% | WP_000099686.1 | 86564..86950   |
| <i>TraC</i>       | Type IV secretion                                              | 875  | 100% | 99.89%  | WP_001064245.1 | 86947..89574   |
| <i>TraR</i>       | Dksa                                                           | 73   | 100% | 100.00% | CAF2485283.1   | 89734..89955   |
| <i>TraV</i>       | Lipoprotein                                                    | 171  | 100% | 100.00% | WP_000809838.1 | 90090..90605   |
| <i>TrbG</i>       | Transfer protein                                               | 83   | 100% | 100.00% | WP_001038342.1 | 90602..90853   |
| <i>TraB</i>       | Transfer Protein                                               | 475  | 100% | 100.00% | WP_001825178.1 | 91629..93056   |
| <i>TraK</i>       | Secretin                                                       | 242  | 100% | 100.00% | WP_001230787.1 | 93056..93784   |
| <i>TraE</i>       | Transfer Protein                                               | 188  | 100% | 100.00% | WP_000399792.1 | 93771..94337   |
| <i>TraL</i>       | Transfer Protein                                               | 103  | 100% | 100.00% | WP_000012106.1 | 94359..94670   |
| <i>TraA</i>       | Pilin                                                          | 121  | 100% | 100.00% | WP_000994779.1 | 94685..95050   |
| <i>TraY</i>       | Relaxosome                                                     | 131  | 100% | 100.00% | CAE6395130.1   | 95083-95478    |
| <i>TraJ</i>       | conjugal transfer transcriptional activator                    | 229  | 100% | 100.00% | WP_000283385.1 | 95577..96266   |
| <i>TraM</i>       | Relaxosome                                                     | 127  | 100% | 100.00% | WP_001151524.1 | 96453..96836   |

**Table S7.** BLASTN results of nucleotide homology to *E. coli* 1000C-3 plasmids.

| Organism                                                                                                        | Query cover (%) | Identity (%) | E-value |
|-----------------------------------------------------------------------------------------------------------------|-----------------|--------------|---------|
| <b>pMHW-1</b>                                                                                                   |                 |              |         |
| <i>Pseudomonas aeruginosa</i> strain 10265 plasmid p10265-KPC, complete sequence                                | 88%             | 99.95%       | 0       |
| <i>Citrobacter braakii</i> strain CRE3 plasmid pCRE3-KPC, complete sequence                                     | 62%             | 99.95%       | 0       |
| <i>Klebsiella pneumoniae</i> strain A1705 plasmid pA1705-KPC, complete sequence                                 | 89%             | 99.89%       | 0       |
| <i>Citrobacter freundii</i> isolate CF121SC21 genome assembly, plasmid: 1                                       | 89%             | 99.89%       | 0       |
| <i>Enterobacter hormaechei</i> strain 189 plasmid pECL189-1, complete sequence                                  | 62%             | 99.89%       | 0       |
| <i>Aeromonas veronii</i> plasmid pWP8-W19-CRE-03_2 DNA, complete genome, strain: WP8-W19-CRE-03                 | 89%             | 99.89%       | 0       |
| <i>Aeromonas hydrophila</i> plasmid pWP8-S18-ESBL-02_1 DNA, complete genome, strain: WP8-S18-ESBL-02            | 89%             | 99.89%       | 0       |
| <i>Aeromonas hydrophila</i> subsp. <i>hydrophila</i> strain WCHAH045096 plasmid pKPC2_045096, complete sequence | 89%             | 99.88%       | 0       |
| <i>Enterobacter cloacae</i> strain 30860 plasmid p30860-KPC, complete sequence                                  | 89%             | 99.87%       | 0       |
| <i>Enterobacter cloacae</i> plasmid pWP8-W19-CRE-02_3 DNA, complete genome, strain: WP8-W19-CRE-02              | 88%             | 99.88%       | 0       |
| <i>Klebsiella pneumoniae</i> strain A1706 plasmid pA1706-KPC, complete sequence                                 | 89%             | 99.88%       | 0       |
| <i>Klebsiella oxytoca</i> strain pKOX3 plasmid p5-KPC                                                           | 89%             | 99.86%       | 0       |
| <i>Enterobacter kobei</i> strain WCHEK045523 plasmid pKPC2_045523, complete sequence                            | 89%             | 99.85%       | 0       |
| <i>Aeromonas caviae</i> plasmid pWP8-S18-CRE-01_2 DNA, complete genome, strain: WP8-S18-CRE-01                  | 86%             | 99.85%       | 0       |
| <i>Klebsiella quasipneumoniae</i> strain WW-14A plasmid pWW14A-KPC2, complete sequence                          | 89%             | 99.75%       | 0       |
| <i>Aeromonas hydrophila</i> GSH8-2 plasmid pGSH8-2 DNA, complete genome                                         | 89%             | 99.88%       | 0       |
| <i>Aeromonas caviae</i> GSH8M-1 plasmid pGSH8M-1-2 DNA, complete genome                                         | 86%             | 99.84%       | 0       |
| <i>Aeromonas taiwanensis</i> strain L186 plasmid p186-KPC, complete sequence                                    | 89%             | 99.66%       | 0       |
| <i>Citrobacter freundii</i> plasmid pCRE12-KPC, complete sequence                                               | 70%             | 100.00%      | 0       |
| <i>Citrobacter</i> sp. strain 172116965 plasmid p116965-KPC, complete sequence                                  | 87%             | 100.00%      | 0       |
| <i>Aeromonas</i> sp. ASNIH3 plasmid pKPC-cd17, complete sequence                                                | 89%             | 99.84%       | 0       |
| <i>Escherichia coli</i> strain Ecol_542 plasmid pEC542_KPC, complete sequence                                   | 89%             | 100.00%      | 0       |
| <b>pMHW-2</b>                                                                                                   |                 |              |         |
| <i>Escherichia coli</i> strain EC45 plasmid pEc45_1, complete sequence                                          | 89%             | 99.86%       | 0       |
| <i>Escherichia coli</i> strain SCU-120 plasmid pSCU-120-1, complete sequence                                    | 95%             | 99.77%       | 0       |
| <i>Escherichia coli</i> strain E-T67-1 plasmid punnamed1, complete sequence                                     | 87%             | 99.83%       | 0       |
| <i>Escherichia coli</i> str. 3249 plasmid RCS105_pI, complete genome                                            | 100%            | 99.74%       | 0       |
| <i>Escherichia coli</i> YJ3 plasmid pYJ3-a DNA, complete genome                                                 | 94%             | 99.85%       | 0       |
| <i>Escherichia coli</i> E308 plasmid pE308_IMP6 DNA, complete sequence                                          | 83%             | 99.84%       | 0       |
| <i>Escherichia coli</i> isolate EC-TO75 genome assembly, plasmid: 2                                             | 67%             | 99.81%       | 0       |
| <i>Escherichia coli</i> strain M63c plasmid pMB2, complete sequence                                             | 82%             | 99.73%       | 0       |
| <i>Escherichia coli</i> strain CA14 plasmid pCA14, complete sequence                                            | 90%             | 99.83%       | 0       |
| <i>Escherichia coli</i> strain p11A plasmid p11A_p2, complete sequence                                          | 87%             | 99.81%       | 0       |
| <i>Escherichia coli</i> strain F16EC0507 plasmid pF16EC0507-1, complete sequence                                | 72%             | 99.81%       | 0       |
| <i>Escherichia coli</i> strain F17EC0098 plasmid pF17EC0098-1, complete sequence                                | 79%             | 99.81%       | 0       |
| <i>Escherichia coli</i> strain C17EC0083 plasmid pC17EC0083-1, complete sequence                                | 86%             | 99.81%       | 0       |
| <i>Escherichia coli</i> strain F16EC0121 plasmid pF16EC0121-2, complete sequence                                | 75%             | 99.81%       | 0       |
| <i>Escherichia coli</i> strain D16EC0206 plasmid pD16EC0206-2, complete sequence                                | 87%             | 99.81%       | 0       |
